# Supplementary material
Source: publisher figshare collection journal article supplement (https://acs.figshare.com/ndownloader/files/25179179)
Supplement: Supplementary file 1 [file 25179179]

# Supporting Information

## Insights into the dynamic catalytic effect of metal sulfide with prominent lithiation process in the application of Li-S batteries

*Jin Wang<sup>a,1</sup>, Ting Zhang<sup>c,1</sup>, Zijia Xu<sup>a</sup>, Guo Ai<sup>a\*</sup>, Wei Yue<sup>b</sup>, Kehua Dai<sup>b</sup>, Bo Zhang<sup>a</sup>, Dejun Li<sup>a\*</sup>, Shaohua Yang<sup>e</sup>,  
Jingbo Zhang<sup>b</sup>, Gao Liu<sup>d</sup>, Wenfeng Mao<sup>b\*</sup>*

*a* Tianjin International Joint Research Centre of Surface Technology for Energy Storage Materials, College of Physics and Materials Science, Tianjin Normal University, Tianjin 300387, China.

*b* Tianjin Key Laboratory of Structure and Performance for Functional Molecules, College of Chemistry, Tianjin Normal University, Tianjin 300387, China

*c* Department of physics, Hong Kong University of Science and Technology, Clear Water Bay, Kowloon 999077, Hong Kong, China

*d* Energy Storage and Distributed Resources Division, Lawrence Berkeley National Laboratory, Berkeley, California 94720, United States

*e* Science and Technology on Reliability Physics and Application of Electronic Component Laboratory, No. 5 Electronic Research Institute of the Ministry of Industry and Information Technology, Guangzhou 510610, China

---

<sup>1</sup> These authors contribute equally to this work

\*Corresponding author:

Dr. Guo Ai, E-mail: aiguo\_pku@163.com; Tel: +86 22-23766503

Dr. Dejun Li, Email: dli1961@126.com; Tel: +86 22-23766503

Dr. Wenfeng Mao, E-mail: wenfengmao123@gmail.com; Tel: +86 22-23766531

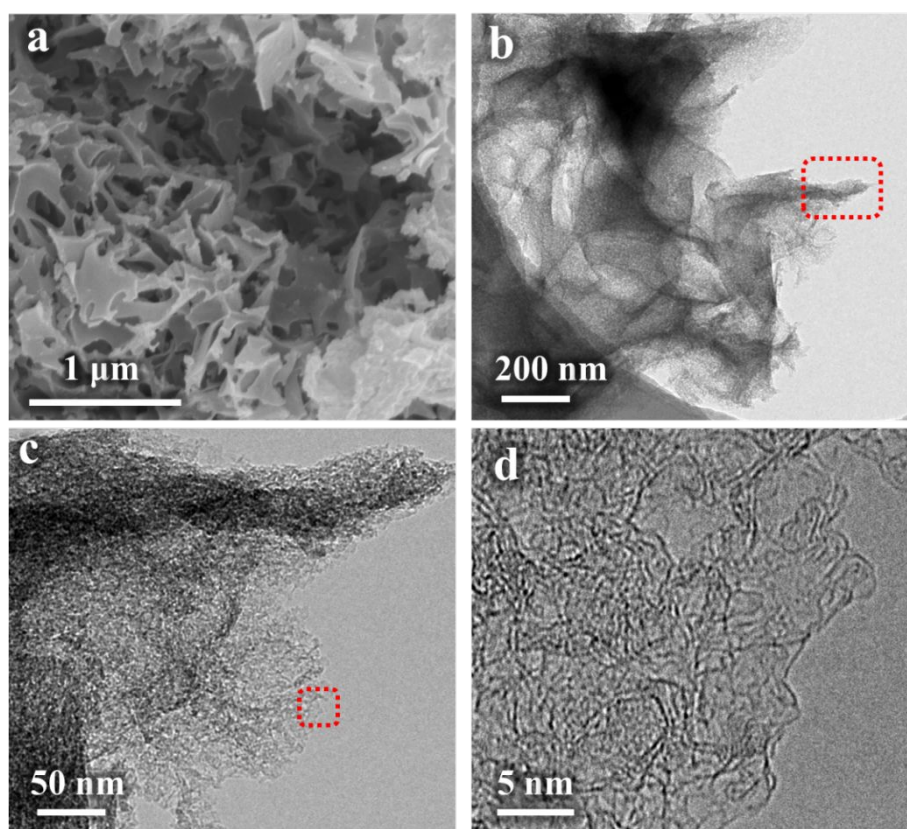

**Figure S1** (a) SEM and (b-d) TEM images of HPGC.

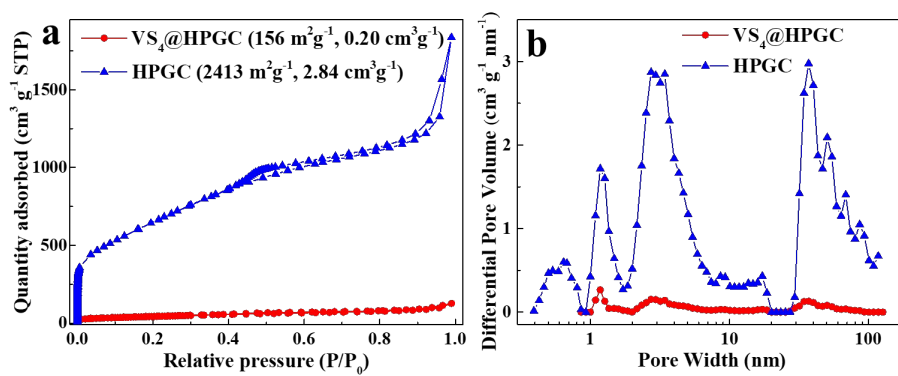

**Figure S2** (a) N<sub>2</sub> adsorption/desorption isotherms and (b) pore-size distributions of VS<sub>4</sub>@HPGC and HPGC.

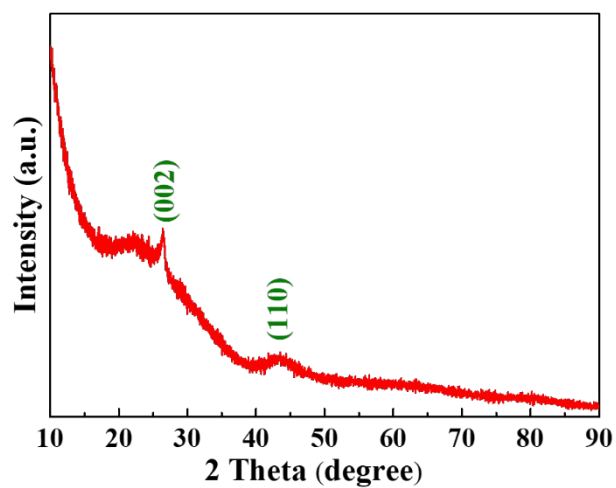

**Figure S3** XRD pattern of HPGC.

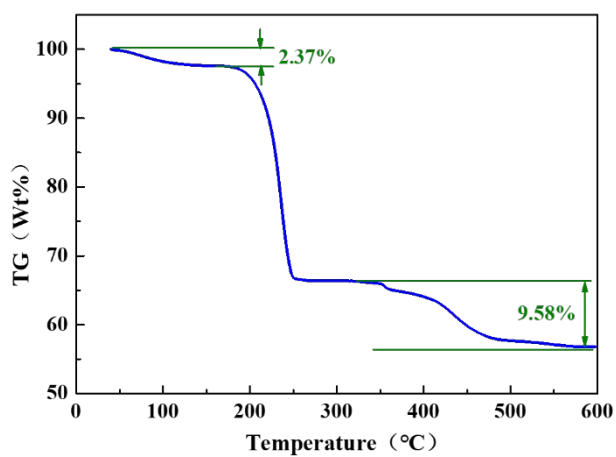

**Figure S4** TG curve of VS<sub>4</sub>@HPGC.

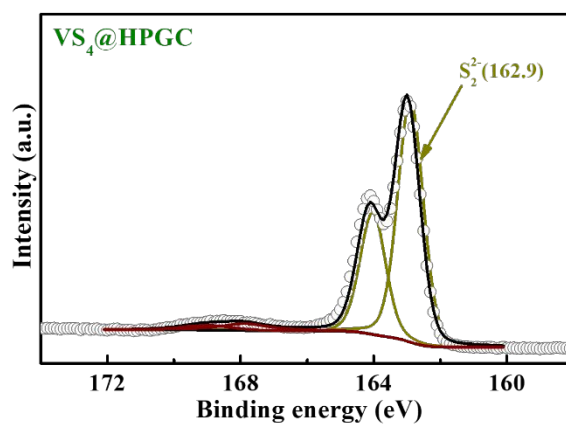

**Figure S5** S 2p XPS spectra of VS<sub>4</sub>@HPGC.

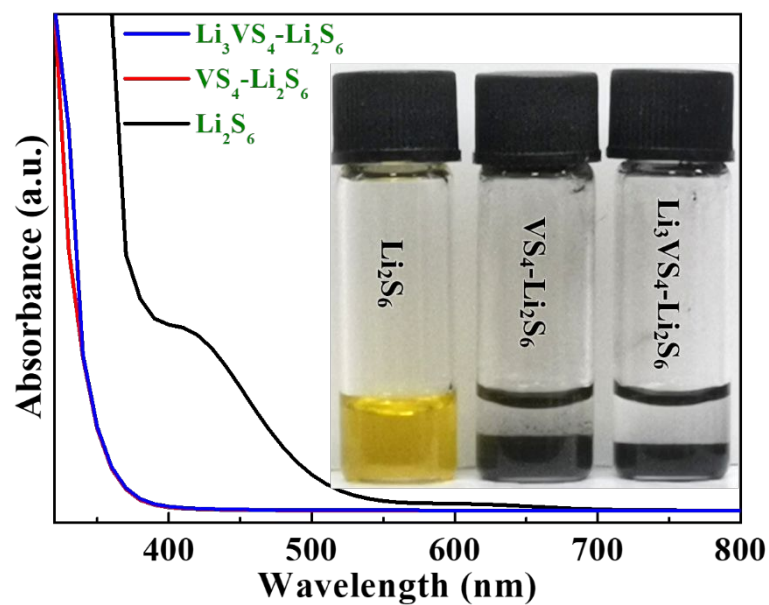

**Figure S6** Photo images and UV-vis spectroscopy measurements of  $\text{Li}_2\text{S}_6$  absorption experiments with  $\text{VS}_4@\text{HPGC}$  and  $\text{Li}_3\text{VS}_4@\text{HPGC}$ .

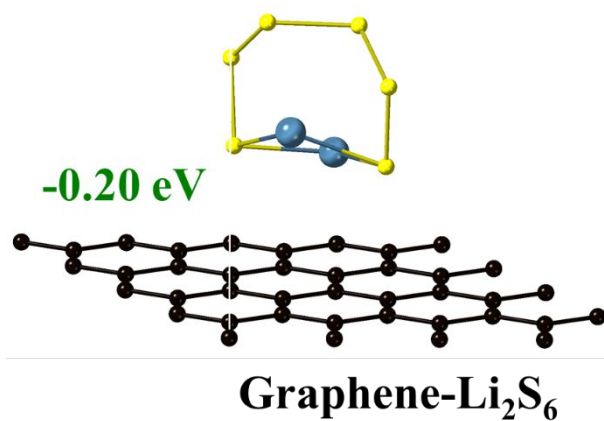

**Figure S7** Optimized adsorption configuration for  $\text{Li}_2\text{S}_6$  on graphene surface by DFT calculation.

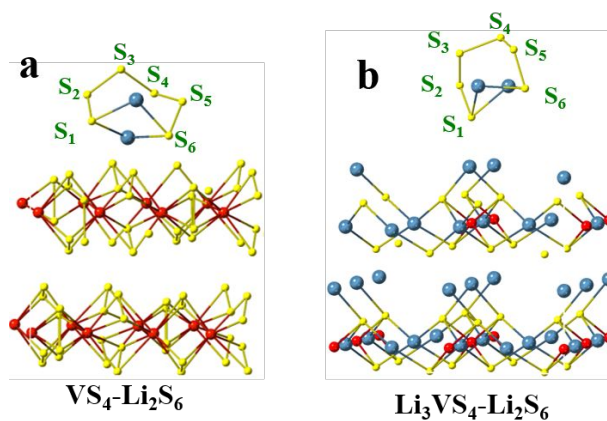

**Figure S8** Index of sulfur atoms in  $\text{Li}_2\text{S}_6$  with optimized adsorption configuration on (a)  $\text{VS}_4$  (-111)

surface, (b)  $\text{Li}_3\text{VS}_4$  (001) surface by DFT calculation.

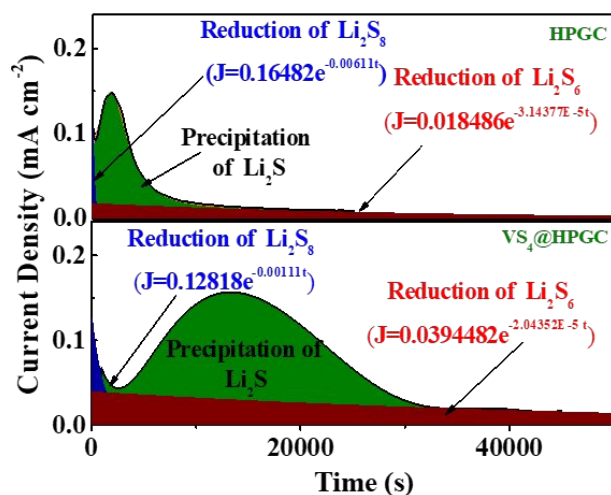

**Figure S9** Fitting results of current vs. time curve on HPGC and  $\text{VS}_4$ @HPGC.

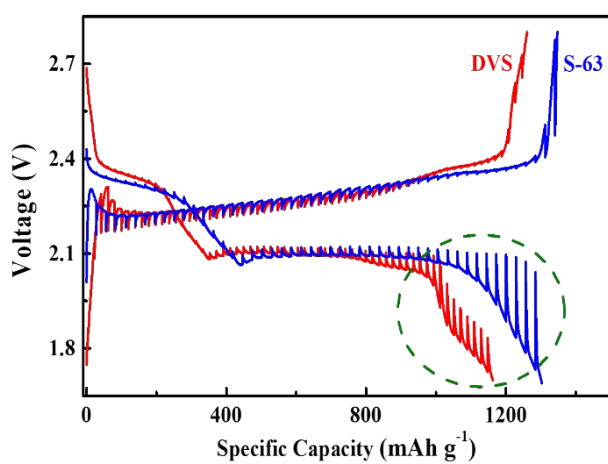

**Figure S10** GITT curves of DVS and S-63.

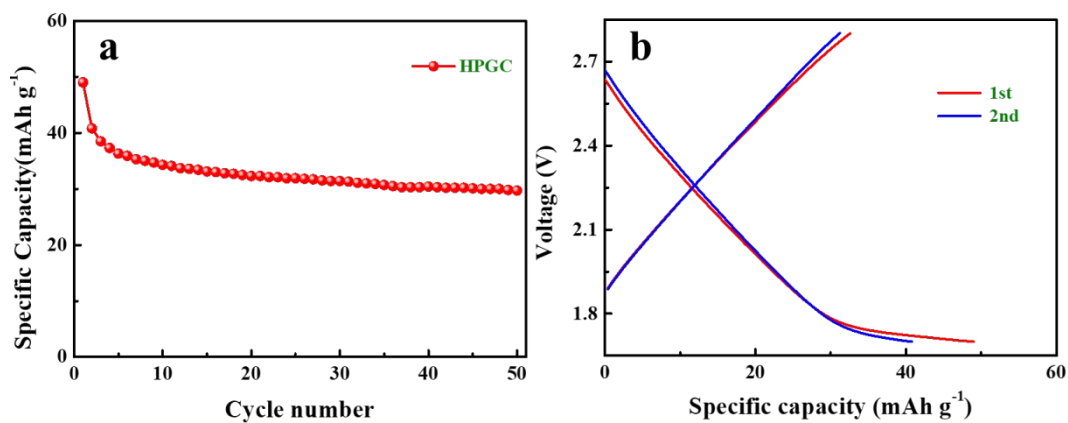

**Figure S11** Cycling performance of HPGC and the charge/discharge curves in the first three cycles.

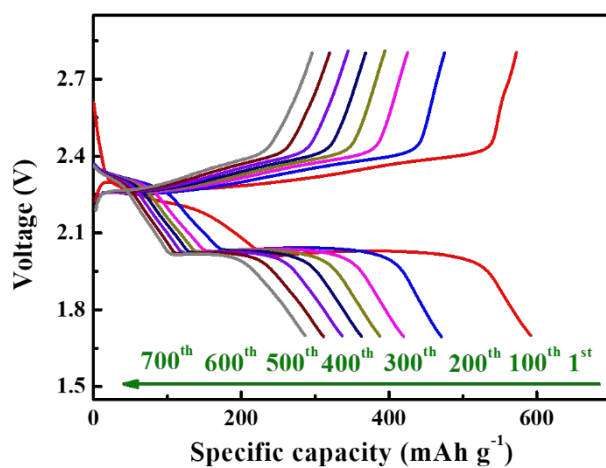

**Figure S12** Charge/discharge curves of DVS at different cycles at 3C.

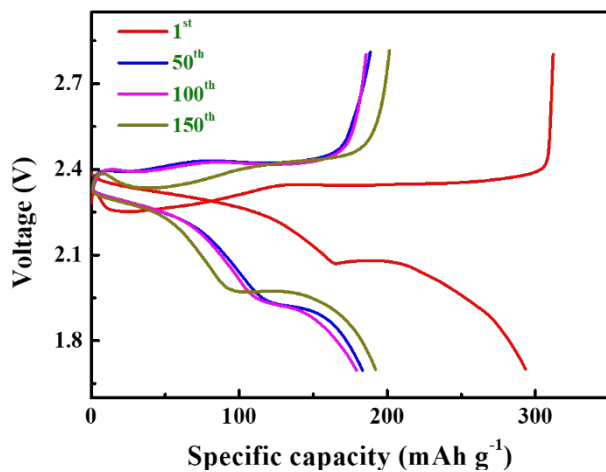

**Figure S13** Charge/discharge curves of S-90 at different cycles at 3C.

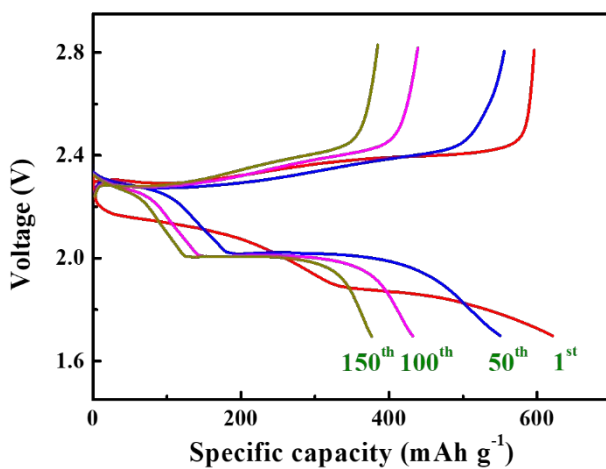

**Figure S14** Charge/discharge curves of S-63 at different cycles at 3C.

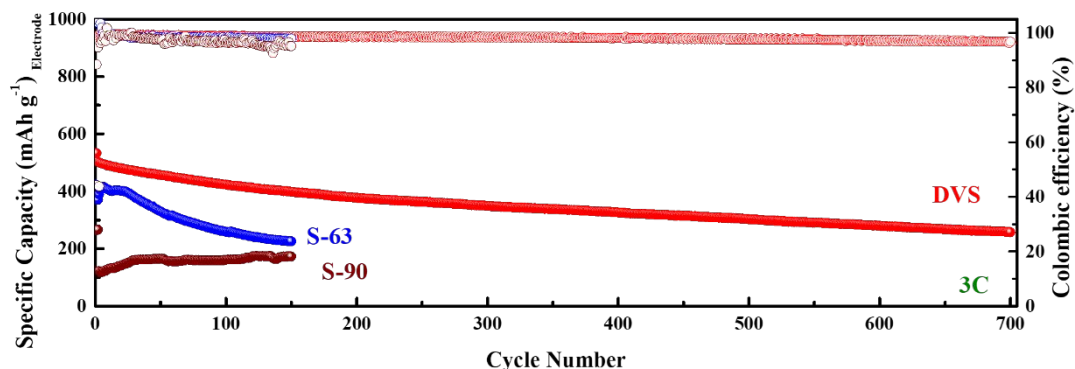

**Figure S15** Cycling performances for DVS, S-63, and S-90 at 3C rate, with the specific capacities calculated based on the weight of electrode.

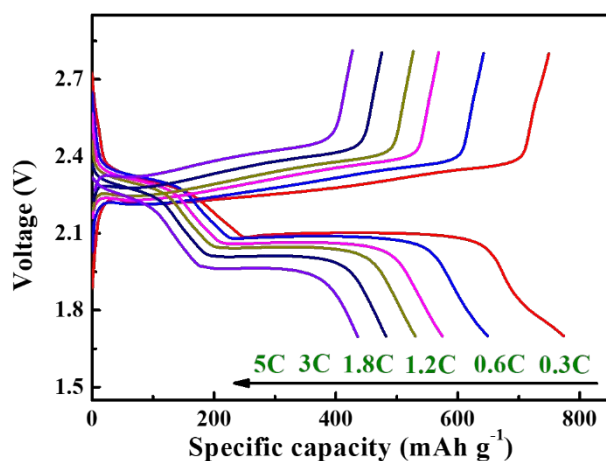

**Figure S16** Charge/discharge curves of DVS at different C-rates.

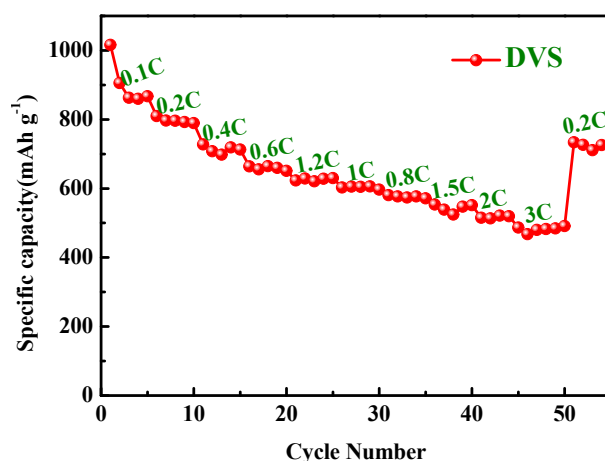

**Figure S17** Rate performances of DVS at different C-rates.

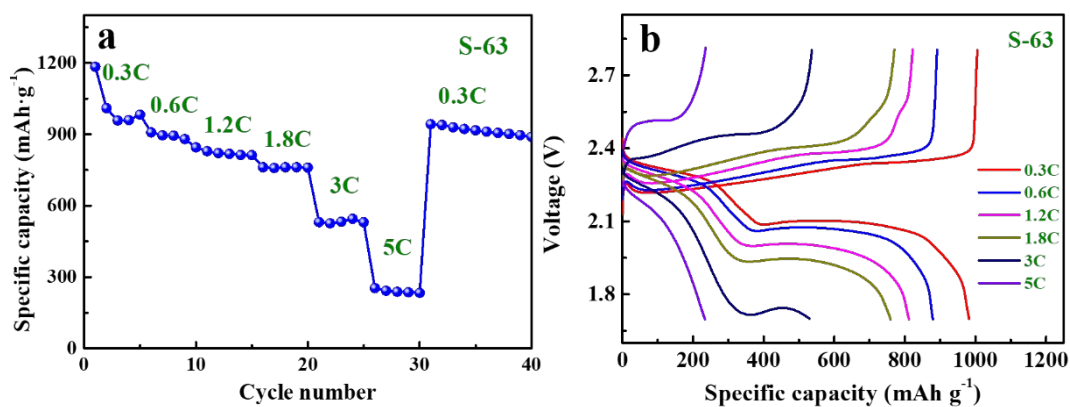

**Figure S18** (a)Rate performances of S-63 and (b) the corresponding charge/discharge curves at different C-rate.

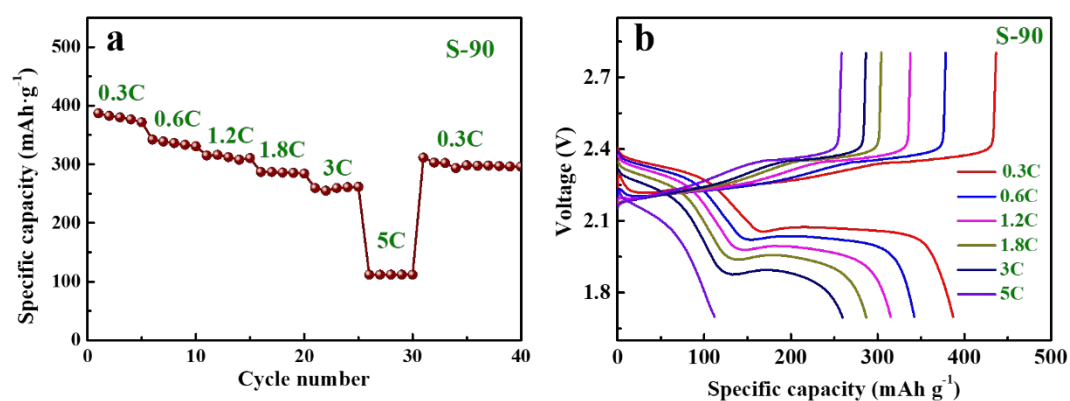

**Figure S19** (a)Rate performances of S-90 and (b) the corresponding charge/discharge curves at different C-rate.

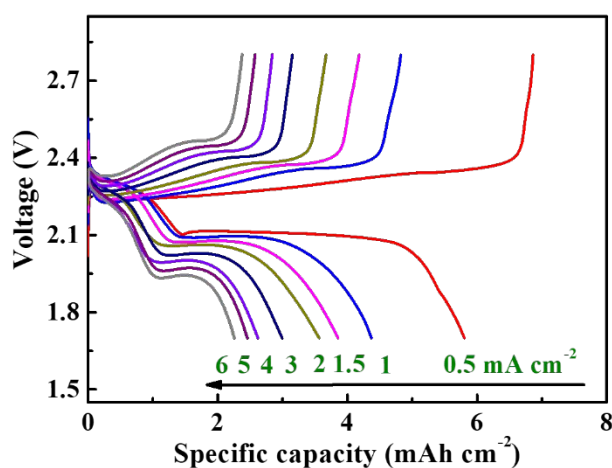

**Figure S20** Charge/discharge curves for the high-loading DVS at different currents.



**Table S1** The EDS results of VS<sub>4</sub>@HPGC

| Element | Atomic fraction | Mass fraction |
|---------|-----------------|---------------|
| C       | 26.47           | 11.79         |
| S       | 55.72           | 62.80         |
| V       | 13.96           | 23.09         |
| O       | 3.85            | 2.33          |

**Table S2** The electrochemical comparison of different metal sulfides in the voltage of 1.7~2.8 V

| Metal<br>sulfides              | Specific capacity<br>(mAh g <sup>-1</sup> ) |                        | Reference |
|--------------------------------|---------------------------------------------|------------------------|-----------|
|                                | First cycle                                 | 10 <sup>th</sup> cycle |           |
|                                |                                             |                        |           |
| VS <sub>4</sub>                | 433.7                                       | 249.4                  | Our work  |
| Co <sub>9</sub> S <sub>8</sub> | 36                                          | 25                     | [1]       |
| TiS <sub>2</sub>               | 215                                         | 167                    | [2]       |
| VS <sub>2</sub>                | 54                                          | 22                     | [3]       |
| MoS <sub>2</sub>               | 6                                           | 92                     | [4]       |
| SnS <sub>2</sub>               | 50                                          | 5                      | [5]       |
| Mo <sub>6</sub> S <sub>8</sub> | 128                                         | ---                    | [6]       |
| CoS <sub>2</sub>               | 126                                         | 75                     | [7]       |
| Sb <sub>2</sub> S <sub>3</sub> | 40                                          | ---                    | [8]       |
| SnS <sub>2</sub>               | 70                                          | ---                    | [9]       |

**Table S3** The length change of S-S bonds for  $\text{Li}_2\text{S}_6$  b interact with  $\text{VS}_4$  and  $\text{Li}_3\text{VS}_4$ 

| Band                    | $\text{Li}_2\text{S}_6$<br>(Å) | $\text{VS}_4\text{-Li}_2\text{S}_6$<br>(Å) | $\text{Li}_3\text{VS}_4\text{-Li}_2\text{S}_6$<br>(Å) |
|-------------------------|--------------------------------|--------------------------------------------|-------------------------------------------------------|
| $\text{S}_1\text{—S}_2$ | 2.058                          | 2.055                                      | 2.076                                                 |
| $\text{S}_2\text{—S}_3$ | 2.045                          | 2.041                                      | 2.052                                                 |
| $\text{S}_3\text{—S}_4$ | 2.191                          | 2.189                                      | 2.242                                                 |
| $\text{S}_4\text{—S}_5$ | 2.048                          | 2.044                                      | 2.043                                                 |
| $\text{S}_5\text{—S}_6$ | 2.057                          | 2.064                                      | 2.072                                                 |

**Table S4** The fitting results of EIS for DVS and S-63

|             | $R_L$ (ohm) | $R_{int}$ (ohm) | $R_{ct}$ (ohm) |
|-------------|-------------|-----------------|----------------|
| <b>DVS</b>  | 3.80        | 4.65            | 13.69          |
| <b>S-63</b> | 5.55        | 8.17            | 15.99          |

## References

1. Pang, Q.; Kundu, D.; Nazar, L. F., A graphene-like metallic cathode host for long-life and high-loading lithium–sulfur batteries. *Mater. Horiz.* **2016**, 3 (2), 130-136.
2. Su, Y.-S.; Manthiram, A., Sulfur/lithium-insertion compound composite cathodes for Li–S batteries. *J. Power Sources* **2014**, 270, 101-105.
3. Qi, H.; Wang, L.; Zuo, T.; Deng, S.; Li, Q.; Liu, Z.-H.; Hu, P.; He, X., Hollow Structure VS<sub>2</sub>@Reduced Graphene Oxide (RGO) Architecture for Enhanced Sodium-Ion Battery Performance. *ChemElectroChem* **2020**, 7 (1), 78-85.
4. Li, S.; Liu, P.; Huang, X.; Tang, Y.; Wang, H., Reviving bulky MoS<sub>2</sub> as an advanced anode for lithium-ion batteries. *J. Mater. Chem. A* **2019**, 7 (18), 10988-10997.
5. Gao, X.; Yang, X.; Li, M.; Sun, Q.; Liang, J.; Luo, J.; Wang, J.; Li, W.; Liang, J.; Liu, Y.; Wang, S.; Hu, Y.; Xiao, Q.; Li, R.; Sham, T.-K.; Sun, X., Cobalt-Doped SnS<sub>2</sub> with Dual Active Centers of Synergistic Absorption-Catalysis Effect for High-S Loading Li-S Batteries. *Adv. Funct. Mater.* **2019**, 29 (8), 1806724.
6. Xue, W.; Shi, Z.; Suo, L.; Wang, C.; Wang, Z.; Wang, H.; So, K. P.; Maurano, A.; Yu, D.; Chen, Y.; Qie, L.; Zhu, Z.; Xu, G.; Kong, J.; Li, J., Intercalation-conversion hybrid cathodes enabling Li–S full-cell architectures with jointly superior gravimetric and volumetric energy densities. *Nat. Energy* **2019**, 4 (5), 374-382.
7. Ai, G.; Hu, Q.; Zhang, L.; Dai, K.; Wang, J.; Xu, Z.; Huang, Y.; Zhang, B.; Li, D.; Zhang, T.; Liu, G.; Mao, W., Investigation of the Nanocrystal CoS<sub>2</sub> Embedded in 3D Honeycomb-like Graphitic Carbon with a Synergistic Effect for High-Performance Lithium Sulfur Batteries. *ACS Appl. Mater. Interfaces* **2019**, 11 (37), 33987-33999.
8. Adachi, K.; Kajino, M.; Zaizen, Y.; Igarashi, Y., Emission of spherical cesium-bearing particles from an early stage of the Fukushima nuclear accident. *Scientific Reports* **2013**, 3 (1), 2554.
9. Xie, R.; Cui, Y.; Zhou, T.; Ren, J.; Zhuo, L.; Luo, J.; Li, C.; Liu, X., Unveiling the structural evolution of 1T SnS<sub>2</sub> anode upon lithiation/delithiation by TEM. *Chemical Communications* **2019**, 55 (54), 7800-7803.
